# Supplementary material for: Effect of Tecoma stans (L.) Juss. ex Kunth in a Murine Model of Metabolic Syndrome
Source: MDPI journal article supplement (doi:10.3390/plants11141794), 2022-07-07
Supplement: s1 [file s1]

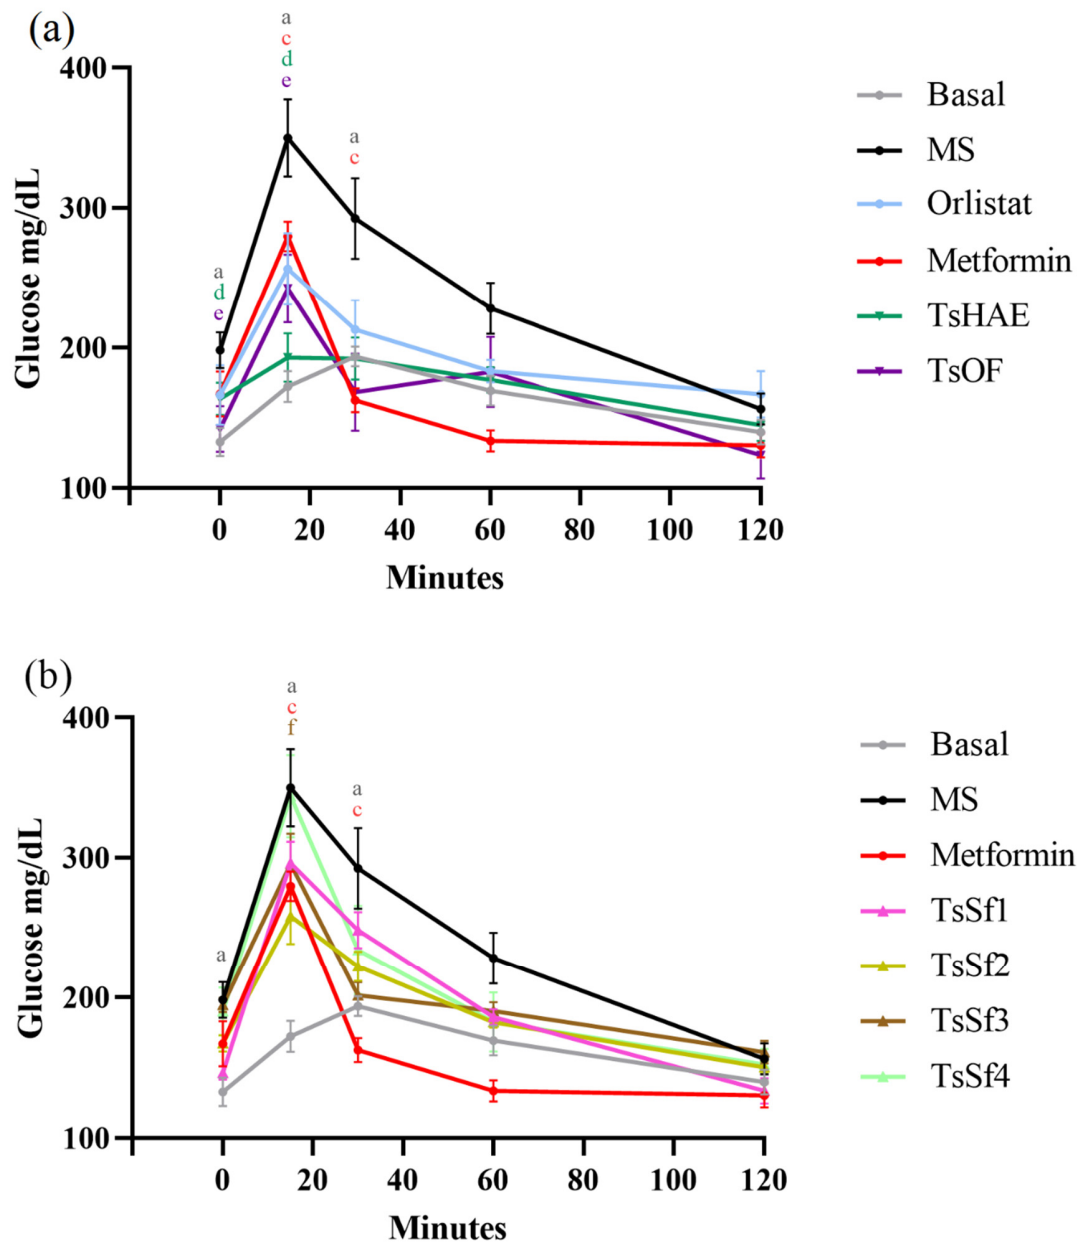

**Figure S1.** Glucose tolerance test in mice fed with standard diet or hypercaloric diet after ten weeks of treatment. (a) Shows hydroalcoholic extract and organic fraction of *T. stans* compared to control groups. (b) Shows subfractions obtained from the organic fraction of *T. stans* (TsSf1, TsSf2, TsSf3 and TsSf4) compared to control groups. Data are expressed as mean  $\pm$  SEM,  $n=6$  in each group. One-way ANOVA-RM, followed by Tukey's test. <sup>a</sup>  $p < 0.05$  by comparison of MS with Basal. <sup>c</sup>  $p < 0.05$  by comparison of Metformin with Basal. <sup>d</sup>  $p < 0.05$  by comparison of TsHAE with Basal. <sup>e</sup>  $p < 0.05$  by comparison of TsOF with Basal. <sup>f</sup>  $p < 0.05$  by comparison of TsSf1 with Basal.
